# Supplementary material
Source: PubMed Central journal article supplement (PMC6679784)
Supplement: NIHMS1531928-supplement-Supplemental_Figures_and_Table.pdf [file NIHMS1531928-supplement-Supplemental_Figures_and_Table.pdf]

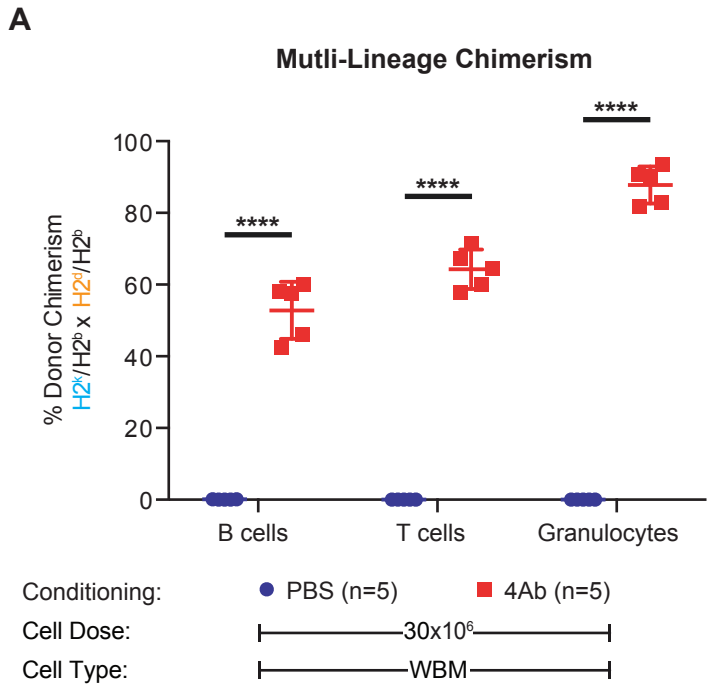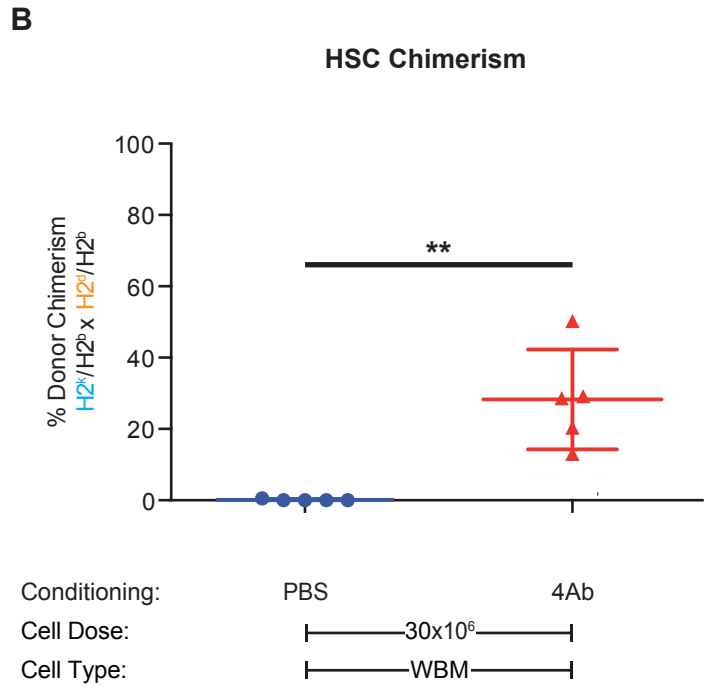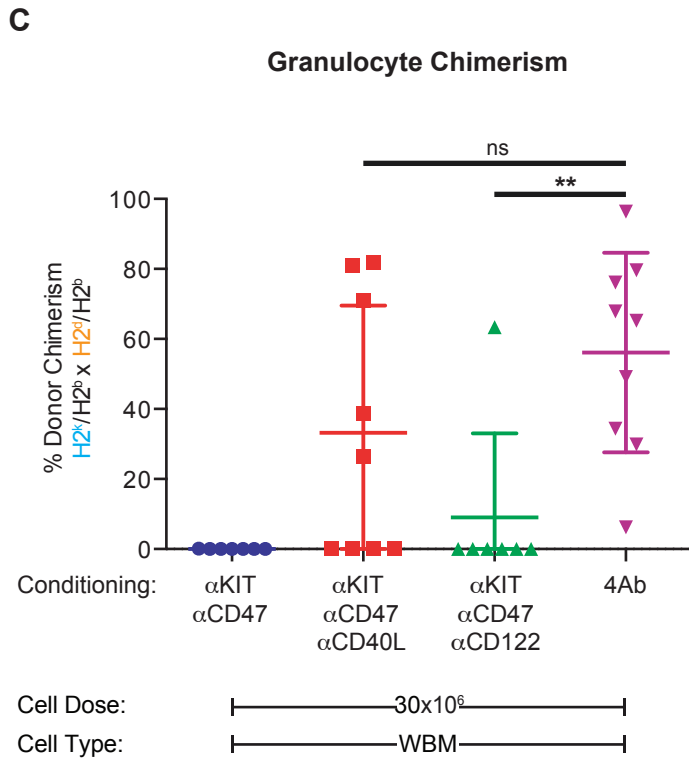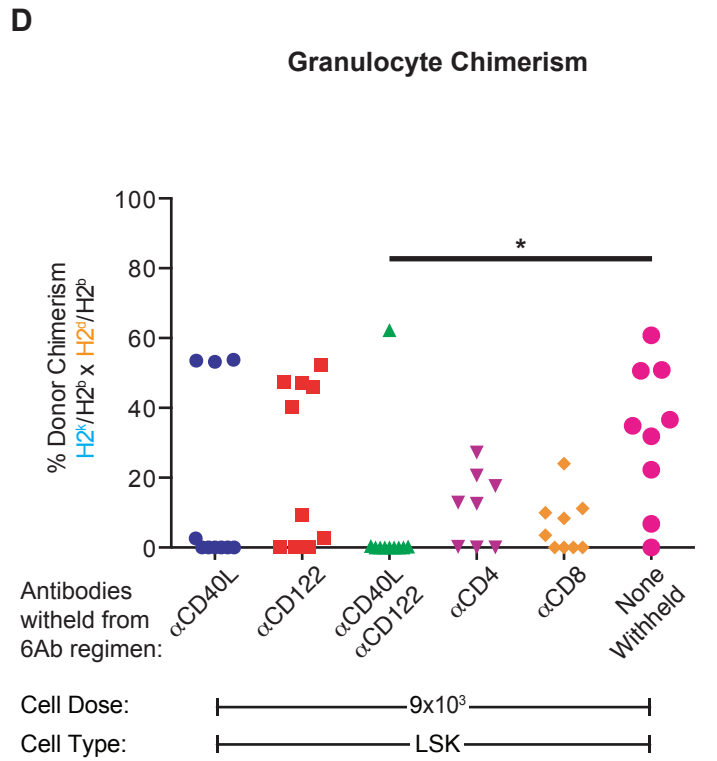

**Figure S1, related to Figures 1 and 2: Peripheral blood and HSC chimerism following antibody conditioning**

(a) Peripheral blood donor chimerism in the T cell, B cell, and granulocyte lineages 16 weeks following haploidentical WBM transplant (n=5). (b) Twenty-eight-week haploidentical donor chimerism in the long-term HSC compartment (Lin- KIT+ Sca1+ CD150+ CD34-) following PBS or Ab conditioning (n=5). (c) Donor granulocyte chimerism after haploidentical transplantation at 8-9 weeks following conditioning with permutations of 4Ab (pooled data from two replicate experiments, pooled n=7-9). (d) Donor granulocyte chimerism following exclusion of individual components of the 6Ab cocktail at 16 weeks in haploidentical transplantation (pooled data from two replicate experiments, pooled n=8-10). Data and error bars in (a-d) represent means  $\pm$  SD; (a), (c), (d) one way ANOVA reveals \*P $\leq$ 0.05, \*\*P $\leq$ 0.01, \*\*\*P $\leq$ 0.001, and \*\*\*\*P $\leq$ 0.0001, (b) unpaired t-test reveals P $\leq$ 0.01

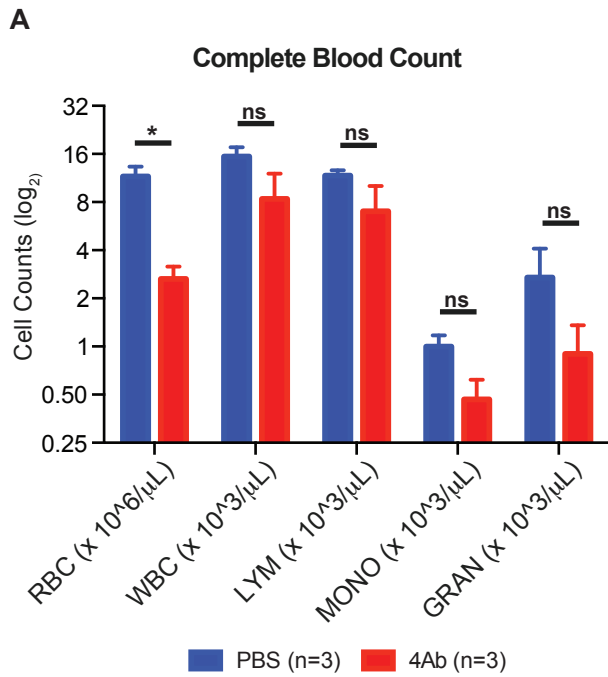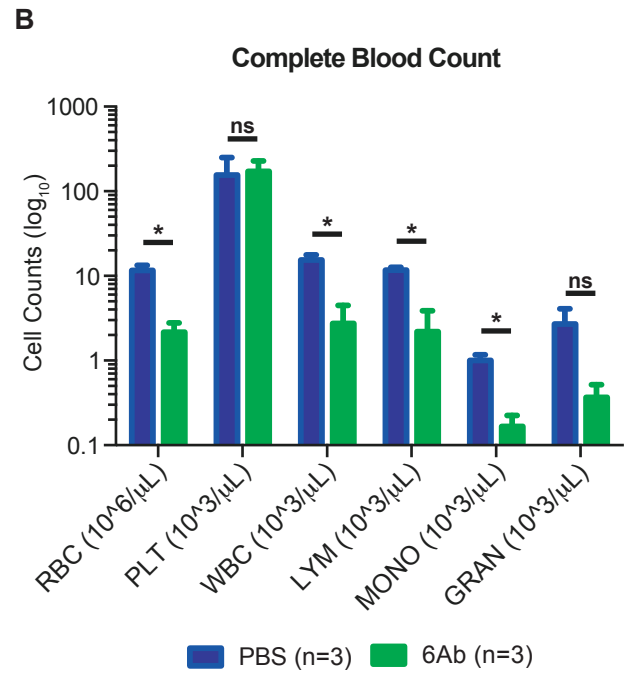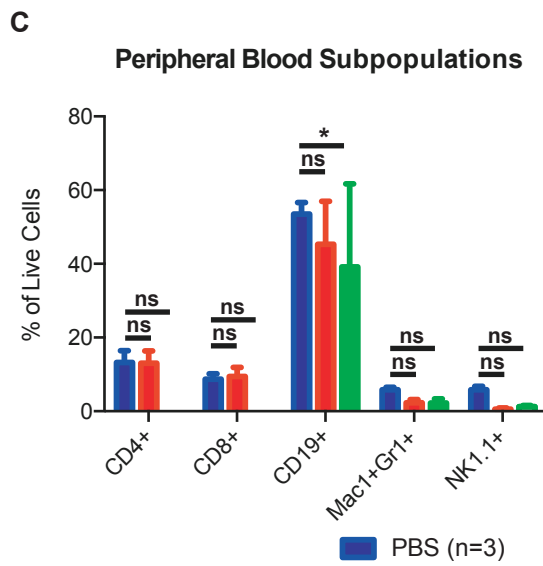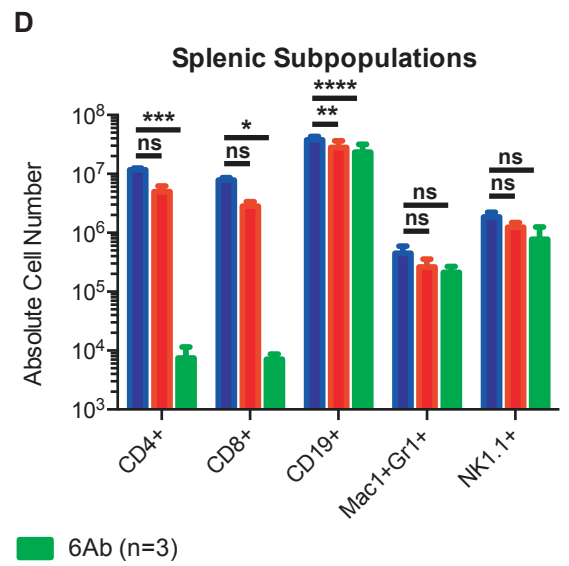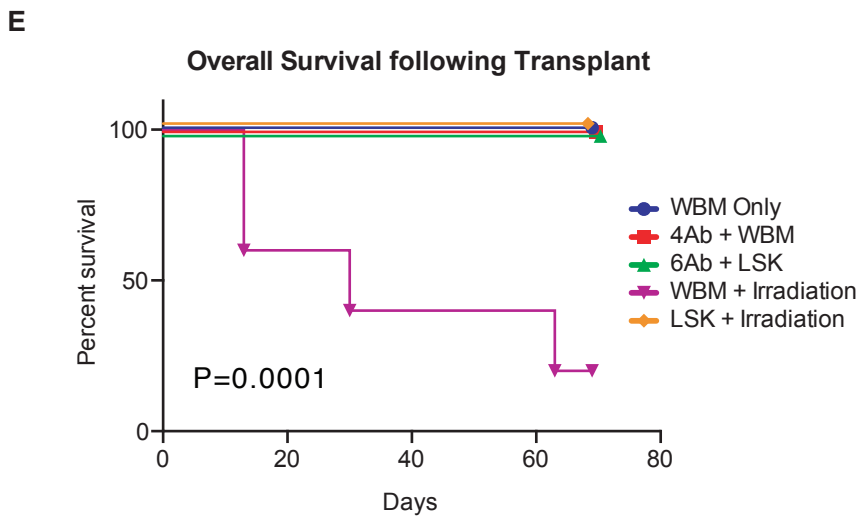

**Figure S2, related to Figures 1 and 2: Immunodepletion following antibody conditioning and survival following major mismatch transplant**

(a-b) CBC following conditioning on Day 0 of the (a) 4Ab and (b) 6Ab conditioning protocol (n=3). (c-d) (c) Peripheral blood subpopulations and (d) splenic subpopulations from animals on Day 0 of the PBS, 4Ab, and 6Ab conditioning protocol (n=3). (e) Overall survival of animals transplanted with either LSK or WBM from fully MHC-mismatched donors using either antibody conditioning or irradiation (n=5). Data and error bars in (a-d) represent means  $\pm$  SD; (a-b) multiple t-tests reveal  $*P \leq 0.05$ , (b-c) two way ANOVA was performed where  $*P \leq 0.05$ ,  $**P \leq 0.01$ ,  $***P \leq 0.001$  and  $****P \leq 0.0001$ , (d) log-rank (Mantel-Cox) test yielded  $P = 0.0001$ .

**Supplemental Table 1, related to Figures 1, 2, S1 and S2.** All donor and recipient mice were female unless otherwise noted (\*indicates male recipients were used, \*\* indicates male and female recipients were used).

| Donor                              | Recipient                   | Mismatch       | Conditioning Used                                                         | Cell Type         | Cell Dose | Number Of Animals | Percentage of Animals Chimeric | Average Granulocyte Chimerism of Chimeric Animals | Timepoint (weeks) |
|------------------------------------|-----------------------------|----------------|---------------------------------------------------------------------------|-------------------|-----------|-------------------|--------------------------------|---------------------------------------------------|-------------------|
| <b>A. Related to Figure 1C</b>     |                             |                |                                                                           |                   |           |                   |                                |                                                   |                   |
| AKR/J x C57Bl/6 F1 (AB6F1)         | Balb/c x C57Bl/6 F1 (CB6F1) | Haploidentical | anti-KIT<br>anti-CD47<br>anti-CD40L                                       | Whole Bone Marrow | 30e6      | 10                | 90.00                          | 79.39                                             | 14-16             |
| AB6F1                              | CB6F1                       | Haploidentical | anti-KIT<br>anti-CD47<br>anti-CD40L                                       | Whole Bone Marrow | 3e6       | 10                | 30.00                          | 32.20                                             | 14-16             |
| AB6F1                              | CB6F1                       | Haploidentical | anti-KIT<br>anti-CD47<br>anti-CD40L<br>anti-CD122                         | Whole Bone Marrow | 30e6      | 5                 | 100.00                         | 76.88                                             | 14-16             |
| AB6F1                              | CB6F1                       | Haploidentical | anti-KIT<br>anti-CD47<br>anti-CD40L<br>anti-CD122                         | Whole Bone Marrow | 3e6       | 10                | 90.00                          | 27.38                                             | 14-16             |
| <b>B. Related to Figure 1D</b>     |                             |                |                                                                           |                   |           |                   |                                |                                                   |                   |
| AB6F1                              | CB6F1                       | Haploidentical | Irradiation                                                               | Whole Bone Marrow | 3e6       | 5                 | 100.00                         | 99.98                                             | 16                |
| AB6F1                              | CB6F1                       | Haploidentical | Irradiation                                                               | Lin-KIT+ Sca-1+   | 9e3       | 5                 | 100.00                         | 99.96                                             | 16                |
| AB6F1                              | CB6F1                       | Haploidentical | anti-KIT<br>anti-CD47<br>anti-CD40L<br>anti-CD122                         | Whole Bone Marrow | 3e6       | 5                 | 80.00                          | 19.05                                             | 16                |
| AB6F1                              | CB6F1                       | Haploidentical | anti-KIT<br>anti-CD47<br>anti-CD40L<br>anti-CD122                         | Lin-KIT+ Sca-1+   | 9e3       | 5                 | 0.00                           | 0.00                                              | 16                |
| <b>C. Related to Figure 1E, 2B</b> |                             |                |                                                                           |                   |           |                   |                                |                                                   |                   |
| AB6F1                              | CB6F1                       | Haploidentical | Irradiation                                                               | Lin-KIT+ Sca-1+   | 9e3       | 5                 | 100.00                         | 0.00                                              | 8                 |
| AB6F1                              | CB6F1                       | Haploidentical | anti-KIT<br>anti-CD47<br>anti-CD40L<br>anti-CD122                         | Lin-KIT+ Sca-1+   | 9e3       | 10                | 10.00                          | 1.56                                              | 8                 |
| AB6F1                              | CB6F1                       | Haploidentical | anti-KIT<br>anti-CD47<br>anti-CD40L<br>anti-CD122<br>anti-CD4<br>anti-CD8 | Lin-KIT+ Sca-1+   | 9e3       | 10                | 90.00                          | 32.89                                             | 8                 |
| <b>D. Related to Figure 1G</b>     |                             |                |                                                                           |                   |           |                   |                                |                                                   |                   |
| DBA/1J                             | CB6F1                       | Full           | Unconditioned                                                             | Whole Bone Marrow | 3e6       | 5                 | 0.00                           | 0.00                                              | 8                 |
| DBA/1J                             | CB6F1                       | Full           | anti-KIT<br>anti-CD47<br>anti-CD40L<br>anti-CD122<br>anti-CD4<br>anti-CD8 | Whole Bone Marrow | 3e6       | 5                 | 40.00                          | 3.65                                              | 8                 |
| DBA/1J                             | CB6F1                       | Full           | anti-KIT<br>anti-CD47<br>anti-CD40L<br>anti-CD122<br>anti-CD4<br>anti-CD8 | Lin-KIT+ Sca-1+   | 9e3       | 5                 | 100.00                         | 52.40                                             | 8                 |
| DBA/1J                             | CB6F1                       | Full           | Irradiation                                                               | Whole Bone Marrow | 3e6       | 5                 | 100.00                         | 98                                                | 8                 |

|                                     |         |                |                                                                           |                         |      |    |        |       |       |
|-------------------------------------|---------|----------------|---------------------------------------------------------------------------|-------------------------|------|----|--------|-------|-------|
| DBA/1J                              | CB6F1   | Full           | Irradiation                                                               | Lin-<br>KIT+<br>Sca-1+  | 9e3  | 5  | 100.00 | 96.80 | 8     |
| <b>E. Related to Figure 2A, S1C</b> |         |                |                                                                           |                         |      |    |        |       |       |
| AB6F1                               | CB6F1*  | Haploidentical | PBS                                                                       | Whole<br>Bone<br>Marrow | 30e6 | 2  | 0.00   | 0.00  | 8-9   |
| AB6F1                               | CB6F1*  | Haploidentical | anti-CD122                                                                | Whole<br>Bone<br>Marrow | 30e6 | 3  | 0.00   | 0.00  | 8-9   |
| AB6F1                               | CB6F1*  | Haploidentical | anti-CD40L                                                                | Whole<br>Bone<br>Marrow | 30e6 | 3  | 0.00   | 0.00  | 8-9   |
| AB6F1                               | CB6F1*  | Haploidentical | anti-KIT                                                                  | Whole<br>Bone<br>Marrow | 30e6 | 3  | 0.00   | 0.00  | 8-9   |
| AB6F1                               | CB6F1*  | Haploidentical | anti-CD47                                                                 | Whole<br>Bone<br>Marrow | 30e6 | 2  | 0.00   | 0.00  | 8-9   |
| AB6F1                               | CB6F1** | Haploidentical | anti-KIT<br>anti-CD47                                                     | Whole<br>Bone<br>Marrow | 30e6 | 7  | 0.00   | 0.00  | 8-9   |
| AB6F1                               | CB6F1** | Haploidentical | anti-KIT<br>anti-CD47<br>anti-CD40L                                       | Whole<br>Bone<br>Marrow | 30e6 | 9  | 55.56  | 59.82 | 8-9   |
| AB6F1                               | CB6F1** | Haploidentical | anti-KIT<br>anti-CD47<br>anti-CD122                                       | Whole<br>Bone<br>Marrow | 30e6 | 9  | 11.11  | 63.40 | 8-9   |
| AB6F1                               | CB6F1** | Haploidentical | anti-KIT<br>anti-CD47<br>anti-CD40L<br>anti-CD122                         | Whole<br>Bone<br>Marrow | 30e6 | 9  | 100.00 | 56.09 | 8-9   |
| <b>F. Related to Figure S1A-B</b>   |         |                |                                                                           |                         |      |    |        |       |       |
| AB6F1                               | CB6F1*  | Haploidentical | PBS                                                                       | Whole<br>Bone<br>Marrow | 30e6 | 5  | 0      | 0.00  | 16/28 |
| AB6F1                               | CB6F1*  | Haploidentical | anti-KIT<br>anti-CD47<br>anti-CD40L<br>anti-CD122                         | Whole<br>Bone<br>Marrow | 30e6 | 5  | 5      | 87.78 | 16/28 |
| <b>G. Related to Figure S1D</b>     |         |                |                                                                           |                         |      |    |        |       |       |
| AB6F1                               | CB6F1   | Haploidentical | anti-KIT<br>anti-CD47<br>anti-CD122<br>anti-CD4<br>anti-CD8               | Lin-<br>KIT+<br>Sca-1+  | 9e3  | 10 | 40.00  | 40.78 | 16    |
| AB6F1                               | CB6F1   | Haploidentical | anti-KIT<br>anti-CD47<br>anti-CD40L<br>anti-CD4<br>anti-CD8               | Lin-<br>KIT+<br>Sca-1+  | 9e3  | 10 | 70.00  | 35.07 | 16    |
| AB6F1                               | CB6F1   | Haploidentical | anti-KIT<br>anti-CD47<br>anti-CD4<br>anti-CD8                             | Lin-<br>KIT+<br>Sca-1+  | 9e3  | 10 | 10.00  | 62.3  | 16    |
| AB6F1                               | CB6F1   | Haploidentical | anti-KIT<br>anti-CD47<br>anti-CD40L<br>anti-CD122<br>anti-CD8             | Lin-<br>KIT+<br>Sca-1+  | 9e3  | 8  | 62.50  | 18.16 | 16    |
| AB6F1                               | CB6F1   | Haploidentical | anti-KIT<br>anti-CD47<br>anti-CD40L<br>anti-CD122<br>anti-CD4             | Lin-<br>KIT+<br>Sca-1+  | 9e3  | 9  | 55.56  | 11.41 | 16    |
| AB6F1                               | CB6F1   | Haploidentical | anti-KIT<br>anti-CD47<br>anti-CD40L<br>anti-CD122<br>anti-CD4<br>anti-CD8 | Lin-<br>KIT+<br>Sca-1+  | 9e3  | 9  | 88.89  | 36.84 | 16    |
